# Supplementary material
Source: ML conference proceedings conference paper supplement (https://proceedings.neurips.cc/paper_files/paper/2019/hash/1b9a80606d74d3da6db2f1274557e644-Abstract.html)
Supplement: Supplementary file [file 1b9a80606d74d3da6db2f1274557e644-Supplemental.zip]

| DataSet       | Url                                                                                                                                                     | Numerical columns | Categorical columns | Sample count |
|---------------|---------------------------------------------------------------------------------------------------------------------------------------------------------|-------------------|---------------------|--------------|
| Adult         | <a href="https://archive.ics.uci.edu/ml/datasets/Adult">https://archive.ics.uci.edu/ml/datasets/Adult</a>                                               | 6                 | 8                   | 48842        |
| Amazon        | <a href="https://www.kaggle.com/bittlingmayer/amazonreviews">https://www.kaggle.com/bittlingmayer/amazonreviews</a>                                     | 0                 | 9                   | 32769        |
| KDD Internet  | <a href="https://kdd.ics.uci.edu/databases/internet_usage/internet_usage.html">https://kdd.ics.uci.edu/databases/internet_usage/internet_usage.html</a> | 47                | 21                  | 10108        |
| KDD Upselling | <a href="http://www.kdd.org/kdd-cup/view/kdd-cup-2009/Data">http://www.kdd.org/kdd-cup/view/kdd-cup-2009/Data</a>                                       | 381               | 38                  | 50000        |
| Epsilon       | <a href="https://www.csie.ntu.edu.tw/~cjlin/libsvmtools/datasets/binary.html">https://www.csie.ntu.edu.tw/~cjlin/libsvmtools/datasets/binary.html</a>   | 2000              | 0                   | 500000       |

Table 1: DataSets.

## 1 Subroutines from greedy algorithm

Here we present c-style pseudo-code for routines, used in greedy algorithm.

```

struct RightSplitIndicator {
    float Border;
    int FeatureIndex;

    bool Value(const float* x) {
        if (x[FeatureIndex] > Border) {
            return true;
        }
        return false;
    }
}

struct SymmetricTree {
    int Depth;
    RightSplitIndicator Conditions[Depth];
    float Leaves[1 << Depth];

    float Value(const float* x) {
        int leaf = 0;
        for (int i = 0; i < Depth; ++i) {
            if (RightSplitIndicator[i].Value(x)) {
                leaf |= 1 << i;
            }
        }
        return Leaves[leaf];
    }
}

```

```

struct Monomial {
    int Depth;
    RightSplitIndicator Conditions[Depth];
    float Value;

    float Value(const float* x) {
        for (int i = 0; i < Depth; ++i) {
            if (Conditions[i].Value(x) == false) {
                return 0;
            }
        }
        return Value;
    }
}

```

```

SymmetricTree MonomialToSymmetricTree(Monomial monomial) {
    SymmetricTree tree;
    tree.Depth = monomial.Depth;
    tree.Conditions = monomial.Conditions;
    for (int i = 0; i < (1 << Depth); ++i) {
        tree.Leaves[i] = 0;
    }
}

```

```

    tree.Leaves[(1 << Depth) - 1] = monomial.Weight;
    return tree;
}

//is monomial subset of tree
//warning: this for clarity only, not the proper implementation
bool IsSubset(Monomial monomial, SymmetricTree tree) {
    set<RightSplitIndicator> treeSplits(tree.Conditions);
    set<RightSplitIndicator> monomialSplits(monomial.Conditions);
    return monomialSplits.Subset(treeSplits);
}

//expects IsSubset(monomial, tree) == True
//warning: code is for algorithm clarity, not the real implementation
void AddMonomialToTree(Monomial monomial, SymmetricTree tree) {
    float* leaves = tree.Leaves();
    RightSplitIndicator* monomialSplits = monomial.Conditions;
    RightSplitIndicator* otSplits = tree.Conditions;

    int treeDepth = tree.Depth;
    int monomialDepth = monomial.Depth;

    vector<int> bitsToFill;
    int baseLeaf = 0;
    {
        int monomialCursor = 0;
        int otCursor = 0;
        while (otCursor < treeDepth) {
            if (polynomCursor < monomialDepth and
                monomialSplits[monomialCursor] == otSplits[otCursor]) {
                baseLeaf |= 1 << otCursor;
                ++monomialCursor;
            } else {
                bitsToFill.push_back(otCursor);
            }
            ++otCursor;
        }
    }

    const int iterCount = 1 << bitsToFill.size();
    for (int i = 0; i < iterCount; ++i) {
        int leaf = baseLeaf;

        for (ui32 j = 0; j < bitsToFill.size(); ++j) {
            if (i & (1 << j)) {
                leaf |= 1 << bitsToFill[j];
            }
        }
        leaves[leaf] += monomial.Value;
    }
}

```
